# Supplementary figures and images for: Trabajo, derechos humanos y movimientos sociales
Source: Royal Society of Chemistry journal article supplement (doi:10.1039/b606249k), 2002-01-01

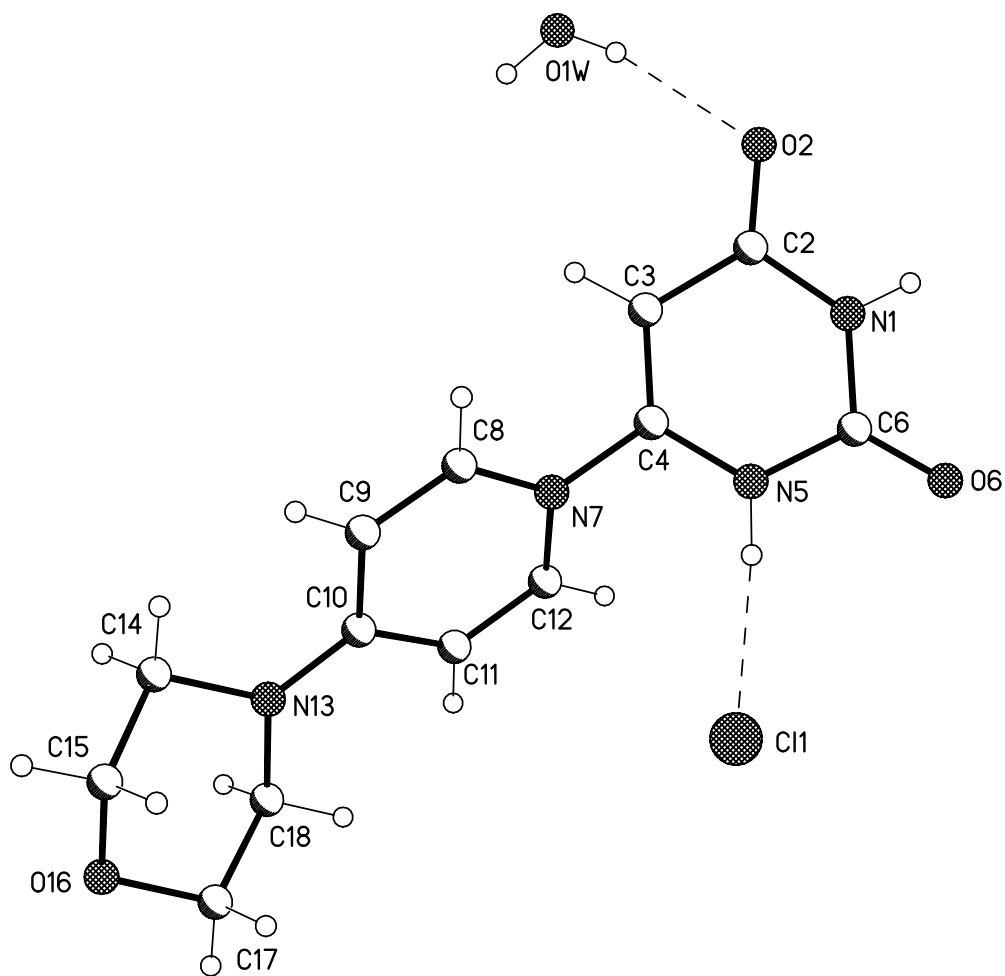

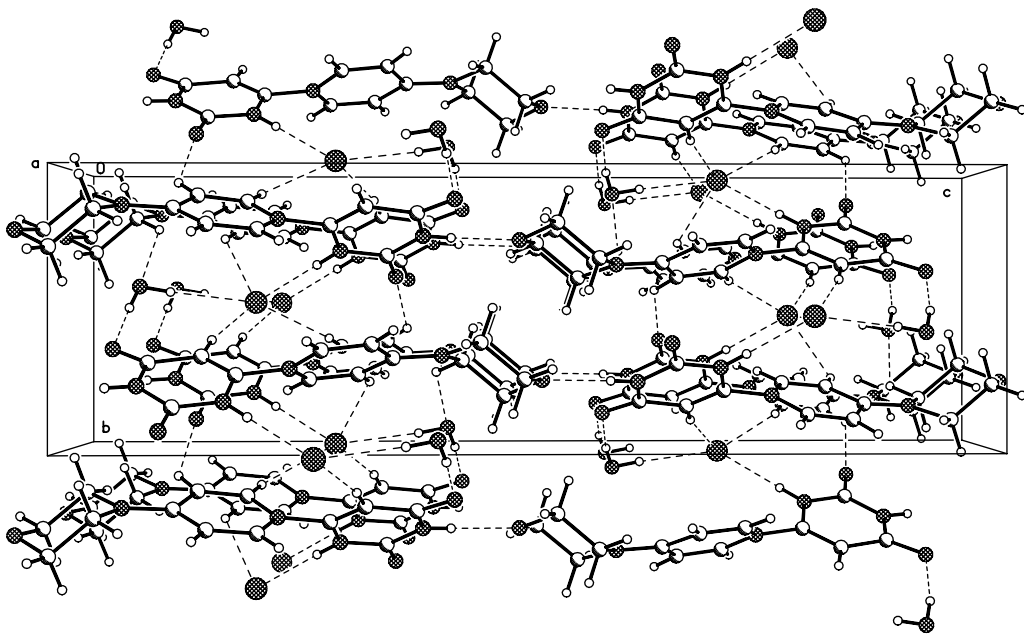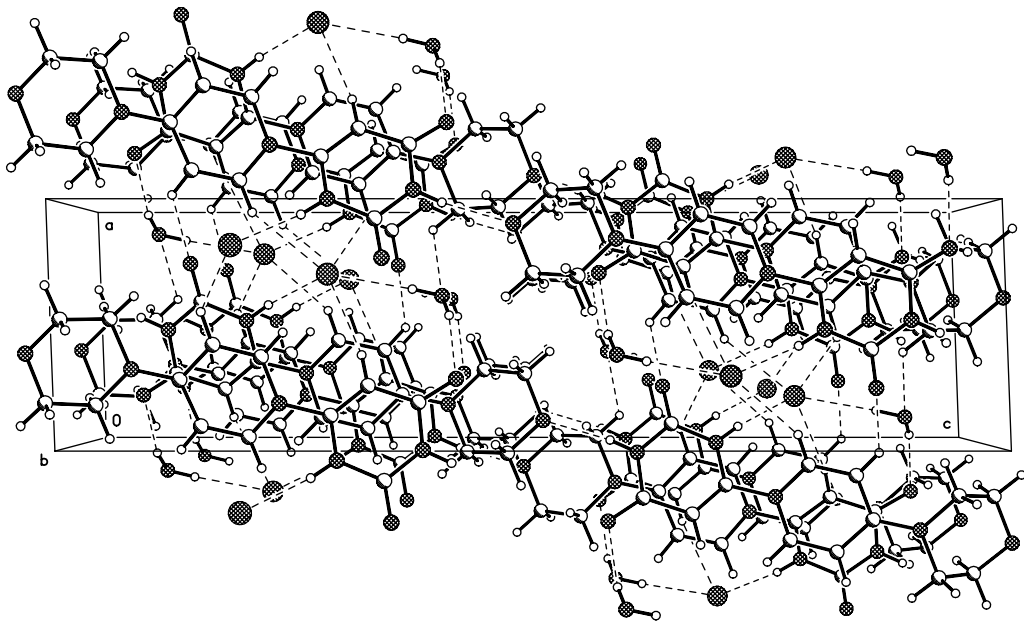

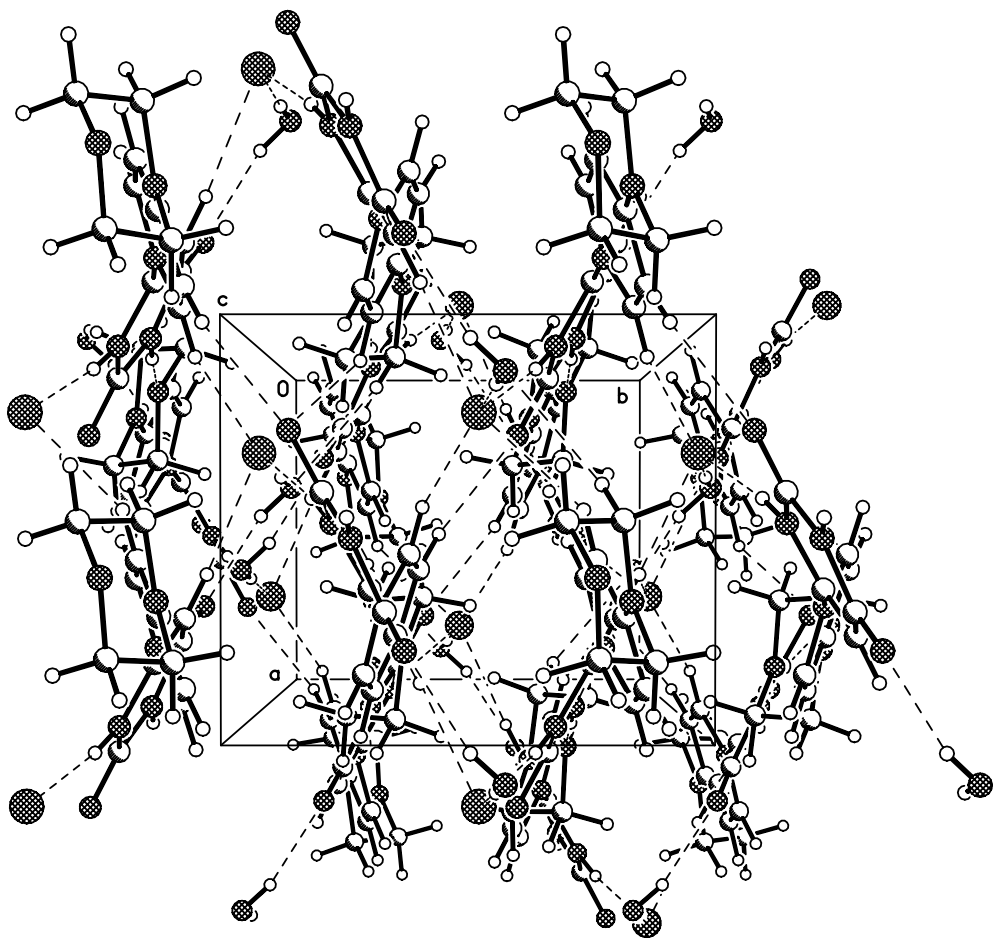

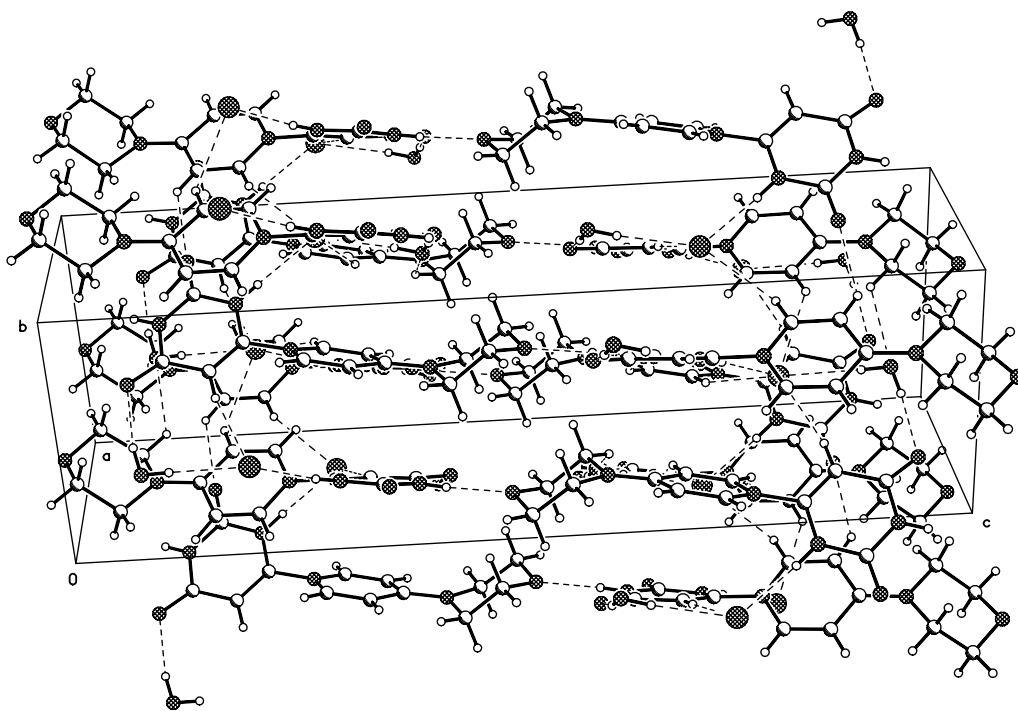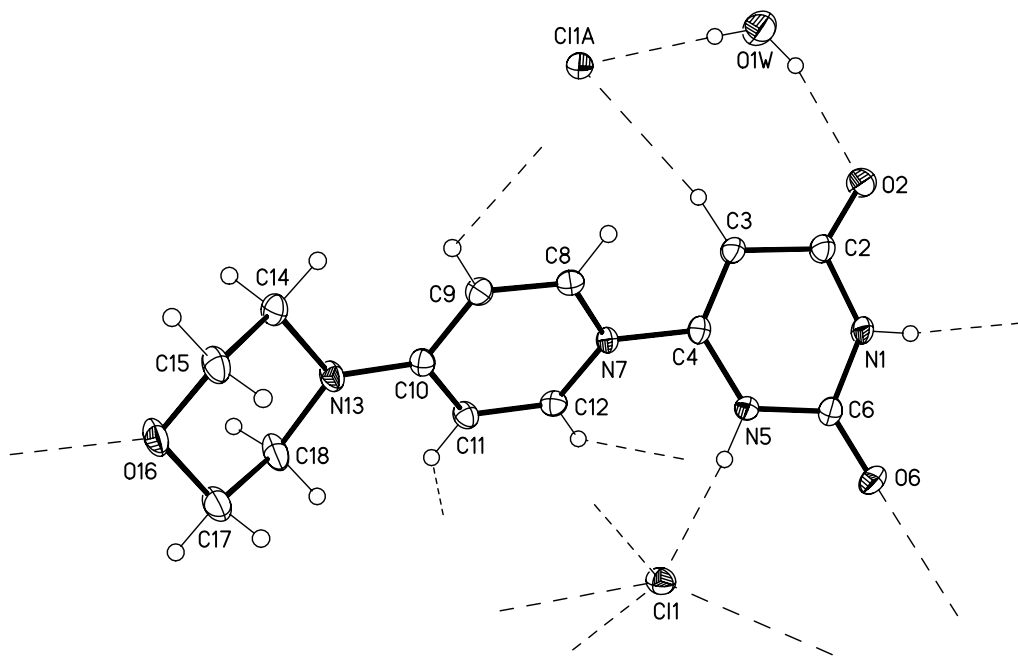

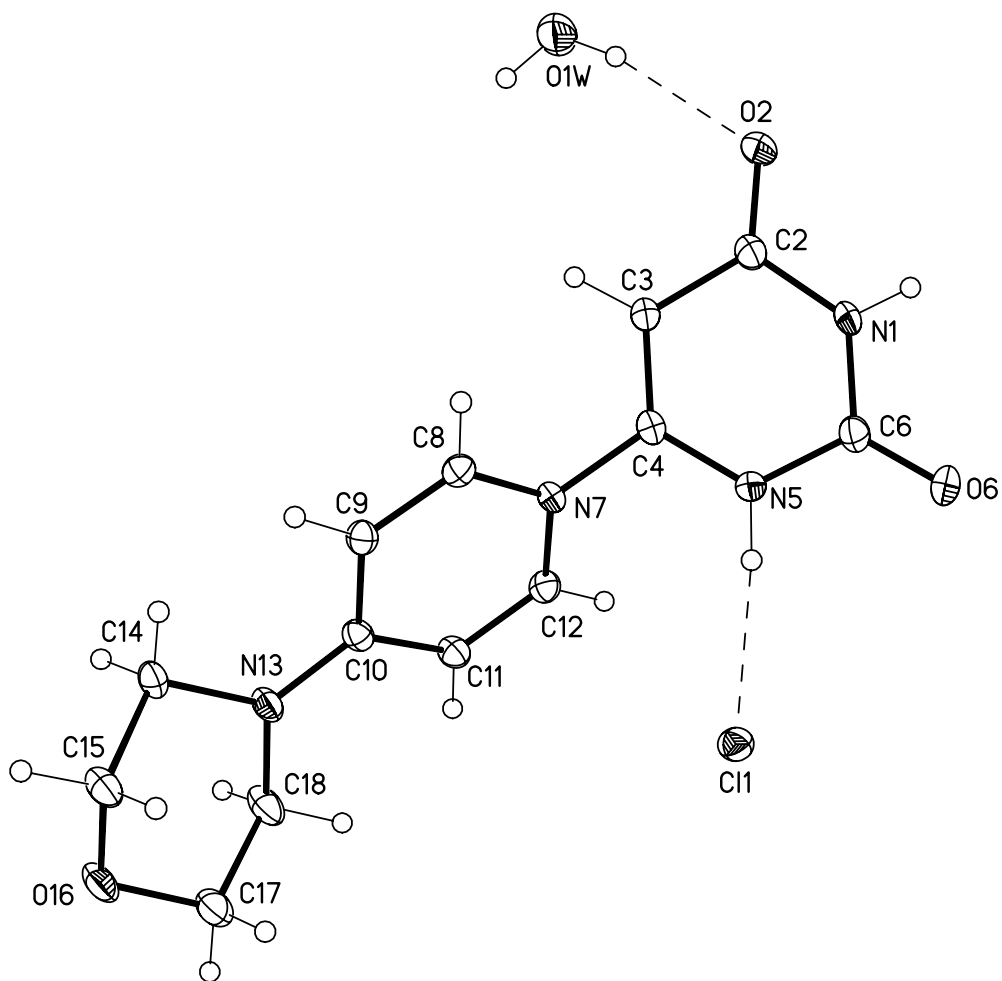

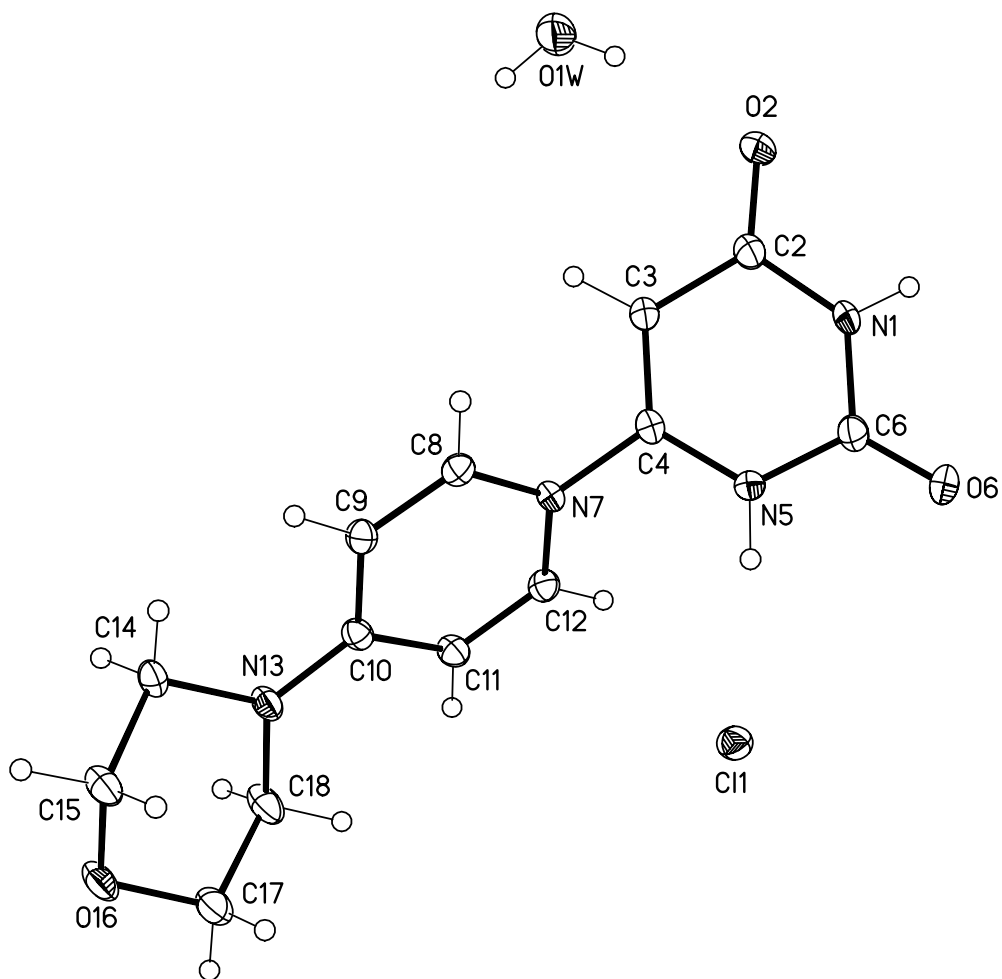

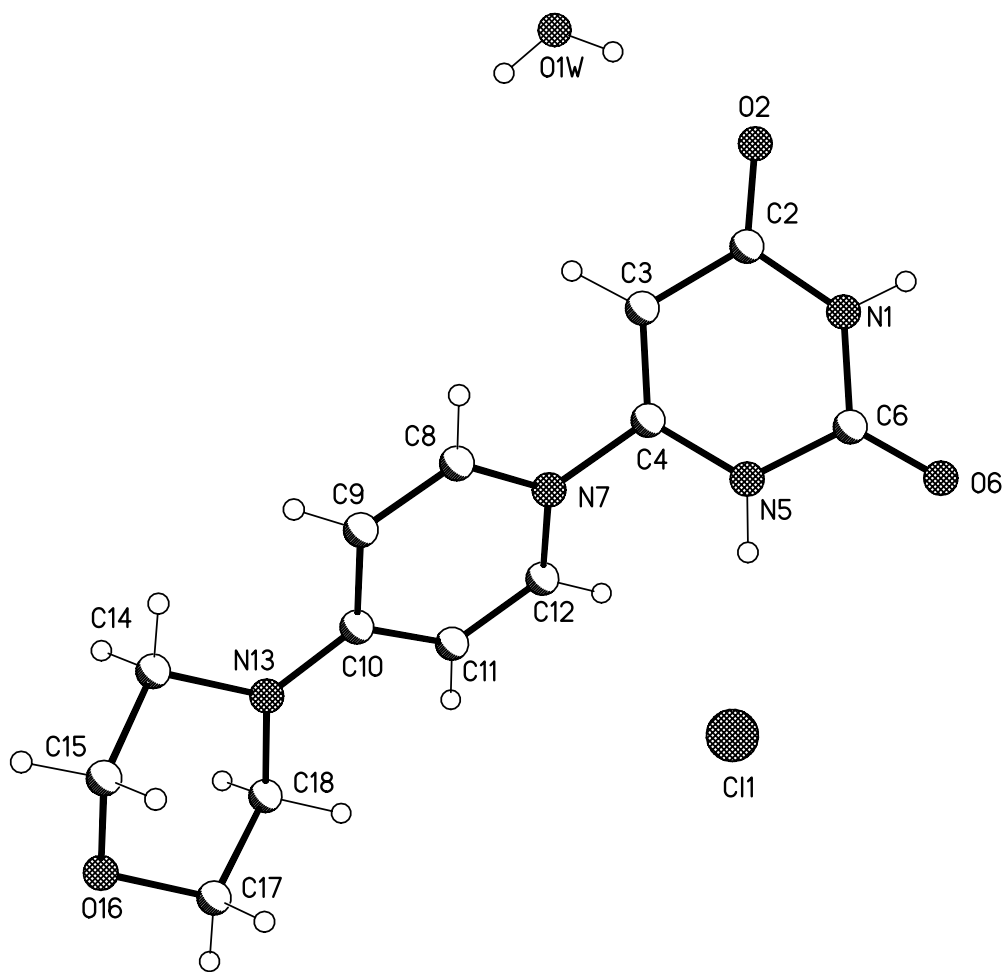

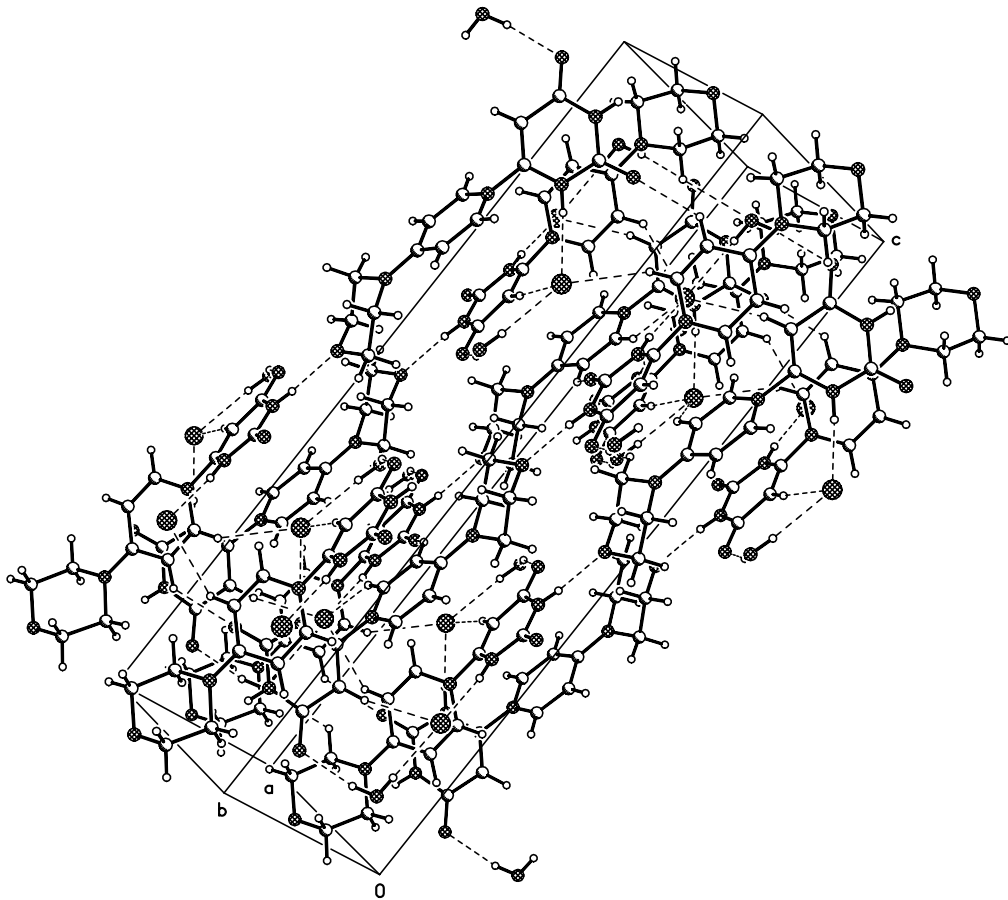



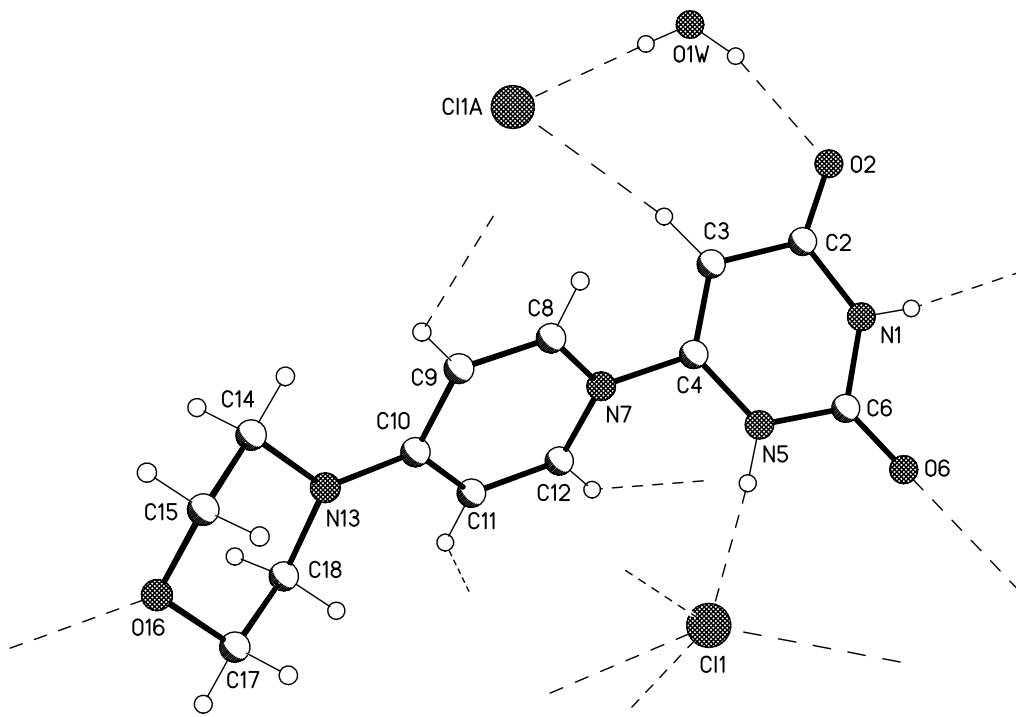

Supplement: b606249k.pdf [file b606249k.pdf]
